# 1 **A robust SARS-CoV-2 replication model in primary human** 2 **epithelial cells at the air liquid interface to assess antiviral** 3 **agents**

4 Thuc Nguyen Dan Do<sup>1</sup>, Arnab K. Chatterjee<sup>2</sup>, Philippe A. Gallay<sup>3</sup>, Michael D. Bobardt<sup>3</sup>, Laura Vangeel<sup>1</sup>,  
5 Steven De Jonghe<sup>1</sup>, Johan Neyts<sup>1</sup>, Dirk Jochmans<sup>1</sup>

6 <sup>1</sup> KU Leuven - Department of Microbiology, Immunology and Transplantation, Rega Institute, Laboratory  
7 of Virology and Chemotherapy, Leuven, Belgium.

8 <sup>2</sup> CALIBR - Department of Medicinal Chemistry, the Scripps Research Institute, La Jolla, CA, USA.

9 <sup>3</sup> CALIBR - Department of Immunology and Microbial Science, the Scripps Research Institute, La Jolla, CA,  
10 USA.

11 Email: [johan.neyts@kuleuven.be](mailto:johan.neyts@kuleuven.be) and [dirk.jochmans@kuleuven.be](mailto:dirk.jochmans@kuleuven.be)

## 12 **ABSTRACT**

13 There are, besides Remdesivir (RDV), no approved antivirals for the treatment and/or prophylaxis of SARS-  
14 CoV-2 infections. To aid in the search for antivirals against this virus, we explored the use of human  
15 tracheal airway epithelial cells (HAEC) and human small airway epithelial cells (HsAEC) grown at the  
16 air/liquid interface (ALI) and infected at the apical side with either one of two different SARS-CoV-2  
17 isolates. The virus was shown to replicate to high titers for extended periods of time (at least 8 days) and,  
18 in particular an isolate with the D614G in the spike (S) protein did so more efficiently at 35°C than at 37°C.  
19 The effect of a selected panel of reference drugs that were added to the culture medium at the basolateral  
20 side of the system was explored. GS-441524 (the parent nucleoside of Remdesivir), EIDD-1931 (the active  
21 metabolite of Molnupiravir) and IFN ( $\beta$ 1 and  $\lambda$ 1) all resulted in a dose-dependent inhibition of viral RNA  
22 and infectious virus titers at the apical side. However, AT-511 (a guanosine nucleotide previously reported  
23 to inhibit SARS-CoV-2) failed to inhibit viral replication. Together, these results provide a reference for  
24 further studies aimed at selecting SARS-CoV-2 inhibitors for further preclinical and clinical development.

## 25 **KEY WORDS**

26 SARS-CoV-2, antivirals, primary human airway epithelial cells, HAEC, GS-441524, EIDD-1931, AT-511, IFN

27

28 **INTRODUCTION**

29 Besides Remdesivir (RDV), there are no approved antivirals for the treatment and/or prophylaxis of SARS-  
30 CoV-2 infections, although the clinical benefit of RDV is still a matter of debate<sup>1</sup>. Major efforts are ongoing  
31 to develop novel antiviral drugs. To aid in their development physiological relevant models are needed, in  
32 particular because typically immortal cell lines also originating from non-respiratory (and often non-  
33 human) tissue are being used in early preclinical studies. For example, VeroE6, a widely used cell line in  
34 SARS-CoV-2 studies is defective in the expression of main the SARS-CoV-2 receptors (angiotensin-  
35 converting enzyme 2 (ACE2) and transmembrane protease serine 2 (TMPRSS2)). Hence, screenings  
36 campaigns often result in the discovery of antiviral agents that regulate autophagy pathways and  
37 endosomal-lysosomal maturation which may not be pertinent or translatable as SARS-CoV-2 therapies<sup>2</sup>.  
38 Meanwhile, air-liquid interface of differentiated primary human airway epithelial cells (HAEC) possess the  
39 architecture and cellular complexity of human lung tissue and are permissive to variety of respiratory viral  
40 infections<sup>3,4</sup>. Containing all relevant cell types of the lower respiratory tract (ciliated, goblet and basal  
41 cells) which includes ACE2 and TMPRSS2 expressing cells, this system allows to dissect the host-pathogen  
42 interactions at the molecular and cellular levels and provides a platform for the profiling of antiviral drugs.

43 In this study, we explored the effect of a selected number of reported SARS-CoV-2 inhibitors in HAEC ALI  
44 cultures on the replication of different SARS-CoV-2 isolates. Our results provide a reference set of data for  
45 the preclinical development of SARS-CoV-2 inhibitors.

46

47

## 48 MATERIALS AND METHODS

### 49 Cells and virus isolates

50 The African monkey kidney cell line VeroE6 tagged green fluorescent protein (VeroE6-GFP, kindly provided  
51 by M. van Loock, Janssen Pharmaceutica, Beerse, Belgium) and VeroE6 were maintained in Dulbecco's  
52 modified Eagle's medium (DMEM; Gibco, catalogue no. 41965-039) supplemented with 10% v/v heat-  
53 inactivated foetal bovine serum (HI-FBS; HyClone, catalogue no. SV03160.03), 1% v/v sodium bicarbonate  
54 7.5% w/v (NaHCO<sub>3</sub>; Gibco, catalogue no. 25080-060), and 1% v/v Penicillin-Streptomycin 10000 U/mL (P/S;  
55 Gibco, catalogue no. 15140148) at 37°C and 5% CO<sub>2</sub>. The hepatocellular carcinoma cell line Huh7 (kindly  
56 provided by Ralf Bartenschlager, University of Heidelberg, Germany) was propagated in DMEM  
57 supplemented with 10% HI-FBS, 1% NaHCO<sub>3</sub>, 1% P/S, 1% non-essential amino acids (NEAA; Gibco,  
58 catalogue no. 11140050), and 2% HEPES 1M (Gibco, catalogue no. 15630106) at 37°C and 5% CO<sub>2</sub>. All  
59 assays involving virus growth were performed in the respective cell growth medium containing 2%  
60 (VeroE6-GFP) or 4% (Huh7) instead of 10% FBS.

61 SARS-CoV-2 isolate BetaCoV/Germany/BavPat1/2020 (EPI\_ISL\_406862 | 2020-01-28, kindly provided by C.  
62 Drosten, Charité, Berlin, Germany) and BetaCov/Belgium/GHB-03021/2020 (EPI\_ISL\_407976 | 2020-02-03)  
63 retrieved from RT-qPCR-confirmed COVID-19 positive patients in January and February 2020 were  
64 described previously<sup>5,6</sup>. The generation of virus stocks by serial passaging in Huh-7 and VeroE6 cells were  
65 fully reported<sup>7,8</sup>. BavPat1 isolate (passage 2 (P2)) and GHB-03021 isolate (P6 and P7) were used for the air  
66 liquid-interface experiment while only the latter was used for standard *in vitro* assays in VeroE6-GFP cells  
67 (P6 and P7) and in Huh7 cells (P9). The genomic sequence of both isolates is highly similar. BavPat1 carries  
68 the D614G amino acid change in the spike-protein while the GHB-03021 has a  $\Delta$ TQTNS deletion at 676-  
69 680 residues that is typical for SARS2 strains that have been passaged several times on VeroE6 cells. All  
70 infectious virus-containing works were conducted in biosafety level 3 (BSL-3) and 3+ (CAPs-IT) facilities at  
71 the Rega Institute for Medical Research, KU Leuven, according to institutional guidelines.

### 72 Compounds

73 GS-441524 and EIDD-1931 were purchased from Carbosynth (United Kingdom) and R&D Systems (USA)  
74 respectively. Stock solutions (10 mM) were prepared using analytical grade dimethyl sulfoxide (DMSO).  
75 AT-511 was synthesized and chemically validated at the California Institute for Biochemical Research  
76 (Calibr) (La Jolla, CA) and used as a 10 mM DMSO solution. The biological activity of AT-511 was confirmed  
77 in an antiviral assay with hepatitis C (data not shown). IFN  $\lambda$ 1 was purchased from R&D Systems and IFN  
78  $\beta$ -1a was a kind gift from the laboratory of Immunobiology (Rega Institute, KU Leuven, Belgium), which  
79 were reconstituted in sterile phosphate buffered saline (PBS, Life Technologies) containing at least 0.1%  
80 FBS.

### 81 *In vitro* standard antiviral and toxicity assays

82 VeroE6-GFP cells were seeded at a density of 25000 cells/well in 96-well plates (Greiner Bio One,  
83 catalogue no. 655090) and pre-treated with three-fold serial dilutions of the compounds overnight. On  
84 the next day (day 0), cells were infected with the SARS-CoV-2 inoculum at a multiplicity of infection (MOI)  
85 of 0.001 median tissue infectious dose (TCID<sub>50</sub>) per cell. The number of fluorescent pixels of GFP signal  
86 determined by High-Content Imaging (HCI) on day 4 post-infection (p.i.) was used as a read-out.  
87 Percentage of inhibition was calculated by subtracting background (number of fluorescent pixels in the  
88 untreated-infected control wells) and normalizing to the untreated-uninfected control wells (also  
89 background subtracted). The 50% effective concentration (EC<sub>50</sub>, the concentration of compound required  
90 for fifty percent recovery of cell-induced fluorescence) was determined using logarithmic interpolation.  
91 Potential toxicity of compounds was assessed in a similar set-up in treated-uninfected cultures where

92 metabolic activity was quantified at day 5 using the MTS assay as described earlier<sup>9</sup>. The 50% cytotoxic  
93 concentration (CC<sub>50</sub>, the concentration at which cell viability reduced to 50%) was calculated by  
94 logarithmic interpolation.

95 Huh7 cells were pre-seeded at 6000 cells/well in 96 well-plates (Corning, catalogue no.3300) and  
96 incubated overnight at 37°C and 5% CO<sub>2</sub>. On day 0, cells were firstly treated with the three-fold serial  
97 dilution of a potential antiviral, followed by either the inoculation of SARS-CoV-2 at MOI of 0.0037  
98 TCID<sub>50</sub>/cell or addition of fresh medium. After 4 days, differences in cell viability caused by virus-induced  
99 cytopathic effect (CPE) or by compound-specific toxicity were evaluated using MTS assays. The EC<sub>50</sub> and  
100 CC<sub>50</sub> were calculated as above-mentioned.

#### 101 **Viral infection of reconstituted human airway epithelium cells**

102 Tracheal HAEC (catalogue no. EP01MD) and human small airway epithelium cells (HsAEC) (catalogue no.  
103 EP21SA) from healthy donors were obtained from Epithelix (Geneva, Switzerland) in an air-liquid  
104 interphase set-up. After arrival, the insert was washed with pre-warmed 1x PBS (Gibco, catalogue no.  
105 14190-094) and maintained in corresponding MucilAir medium (Epithelix, catalogue no. EP04MM) or  
106 SmallAir medium (Epithelix, catalogue no. EP64SA) at 37°C and 5% CO<sub>2</sub> for at least 4 days before use. On  
107 the day of the experiment, the H(s)AEC were first pre-treated with basal medium containing compounds  
108 at different concentrations for indicated hours, followed by exposing to 100 µL of SARS-CoV-2 inoculum  
109 from apical side for 1.5 hours. Then the cultures were incubated at the indicated temperatures. The first  
110 apical wash with PBS was collected either right after the removal of viral inoculum (day 0) or 24 hours  
111 later (day 1 post-infection (p.i.)). Every other day from day 0, subsequent apical washes were collected  
112 whereas compound-containing medium in the basolateral side of the H(s)AEC culture was refreshed.  
113 Wash fluid was stored at -80°C for following experiments.

#### 114 **RNA extraction and quantitative reverse transcription-PCR (RT-qPCR)**

115 Viral RNA in the apical wash was isolated using the Cells-to-cDNA™ II cell lysis buffer kit (Thermo Fisher  
116 Scientific, catalogue no. AM8723). Briefly, 5 µL wash fluid was added to 50 µL lysis buffer, incubated at  
117 room temperature (RT) for 10 min and then at 75°C for 15 min. 150 µL nuclease-free water was  
118 additionally added to the mixture prior to RT-qPCR. In parallel, a ten-fold serial dilution of corresponding  
119 virus stock was extracted. The amount of viral RNA expressed as TCID<sub>50</sub> equivalent per insert  
120 (TCID<sub>50</sub>e/insert) was quantified by RT-qPCR using iTaq universal probes one-step kit (Bio-Rad, catalogue  
121 no. 1725141), and a commercial mix of primers for N gene (forward primer 5'-  
122 GACCCAAAATCAGCGAAAT-3', reverse primer 5'-TCTGGTACTGCCAGTTGAATCTG-3') and probes (5'-  
123 FAM-ACCCCGCATTACGTTTGGTGGACC-BHQ1-3') manufactured at IDT Technologies (catalogue no.  
124 10006606). The reaction (final volume: 20 µL) consisted of 10 µL one-step reaction mix 2X, 0.5 µL reverse  
125 transcriptase, 1.5 µL of primers and probes mix, 4 µL nuclease-free water, and 4 µL viral RNA. The RT-qPCR  
126 was executed on a Lightcycler 96 thermocycler (Roche), starting at 50°C for 15 min and 95°C for 2 min,  
127 followed by 45 cycles of 3 sec at 95°C and 30 sec at 55°C.

#### 128 **Titration using a 50% tissue culture infectious dose (TCID<sub>50</sub>) assay**

129 VeroE6 cells were seeded in 96-well tissue culture plates at a density of 1×10<sup>4</sup> cells/180 µL/well. After 24  
130 hours, serial 10-fold dilutions of ALI wash fluid were prepared in the plates. Cells were incubated for 3  
131 days at 37°C and evaluated microscopically for the absence or presence of virus induced cytopathic effect  
132 (CPE). The infectious viral titer was determined by end-point titration, expressed as TCID<sub>50</sub>/ml. Virus titers  
133 were calculated by using the Spearman and Karber method as previously reported<sup>10,11</sup>.

#### 134 **Statistical analysis**

135 All statistical comparisons in the study were performed in GraphPad Prism (GraphPad Software, Inc.).  
136 Statistical significance was determined using the ordinary one-way ANOVA with Dunnett's multiple  
137 comparison test. P-values of  $\leq 0.05$  were considered significant.

138

## 139 RESULTS

### 140 Replication kinetics of SARS-CoV-2 in reconstituted human airway epithelia

141 We first compared the replication kinetics of the Belgian isolate GHB-03021 and the German isolate  
142 BavPat1. The main differences in the genomes of these viruses is the D614G amino acid change in the  
143 spike-protein of BavPat1 and the deletion of several amino acids near the furin-cleavage site in the GHB-  
144 03021 isolate (because of extensive passaging in VeroE6 cells). The replication kinetics was investigated  
145 at respectively 35 and 37°C in both cultures from tracheal cells (HAEC) or from small airway cells (HsAEC).  
146 In preliminary experiments, it was observed that an input of  $10^2$ ,  $10^3$  or  $10^4$  TCID50/insert resulted in  
147 comparable levels of virus production (data not shown). We therefore selected  $2 \times 10^3$  TCID50/insert as  
148 the viral input for this experiment. Overall, BavPat1 infected the cultures more efficiently than the GHB-  
149 03021 isolate did (Fig. 1). For example, at 37°C not all bronchiole-airway derived inserts infected with  
150 GHB-03021 resulted in a productive infection whereas all cultures infected with BavPat1 showed  
151 productive infection under all conditions. Virus replication was for both isolates higher at 35°C and more  
152 reproducible as compared with a temperature of 37°C. This difference was more pronounced for the  
153 HsAEC than for the HAEC cultures.

154

### 155 Effect of selected antivirals on SARS-CoV-2 replication in HAEC cultures.

156 Three nucleoside analogues that are known as inhibitors of SARS-CoV-2 replication were selected as  
157 reference for studies in HAEC cultures. These included GS-441524<sup>12-16</sup> (the parent nucleoside of RDV),  
158 EIDD-1931<sup>16-18</sup> (the active metabolite of Molnupiravir) and AT-511<sup>17</sup> [a guanosine nucleotide analogue  
159 with activity against hepatitis C virus (HCV)]. In order to select a suitable concentration range of these  
160 molecules to be used in the HAEC cultures, we first explored their effect in VeroE6 and Huh7 cell lines.  
161 Both GS-441524 and EIDD-1931 selectively inhibited SARS-CoV-2 replication. On the other hand, AT-511  
162 was surprisingly entirely devoid of antiviral activity (Table 1).

163 At 10  $\mu$ M, GS-441524 sterilized the HAEC cultures from the GHB-03021 virus. Indeed, no virus production  
164 was detected during the first 9 days of treatment and when treatment was stopped, no rebound was  
165 observed over the next 5 days of culturing. When evaluated at a concentration of 1  $\mu$ M, GS-441524  
166 reduced virus yield by  $\sim 1 \log_{10}$  during the time of treatment, but lost activity once the compound was  
167 removed from the culture. In a separate experiment, GS-441524 at 3  $\mu$ M resulted in complete inhibition  
168 of virus production upon infection with BavPat1 (Fig. 2F-H). Also, 10  $\mu$ M of EIDD-1931 resulted in a  
169 pronounced antiviral effect (Fig. 3F-J). AT-511, however, at the various concentrations tested (1 and 10  
170  $\mu$ M) was devoid of an antiviral effect (Fig. 3A-E).

### 171 Prophylactic interferon type I and type III reduce SARS-CoV-2 production

172 Human IFN has been used to treat several viral infections<sup>19,20</sup> and recently clinical trials against SARS-CoV-  
173 2 are ongoing (ClinicalTrials.gov number: NCT04315948, NCT04385095, and NCT04492475). Therefore,  
174 we investigated whether IFN  $\beta$ -1a and IFN  $\lambda$ 1 exert activity when used as a prophylactic monotherapy.  
175 Tracheal cultures were pre-treated with either 5 and 50 ng/mL IFN  $\lambda$ 1 (5 ng/mL is the average  
176 concentration secreted in the basal medium of infected HAEC cultures<sup>21</sup>) or 1 and 100 IU/mL IFN  $\beta$ -1a for  
177 24 hours, and subsequently infected with BavPat1. Both drugs were able to reduce viral titers in a dose-  
178 dependent manner (Fig. 4A, 4F). Viral loads were reduced by 100 IU/mL IFN  $\beta$ -1a (3.3  $\log_{10}$  vRNA  
179 reduction, 3.6  $\log_{10}$  titer reduction) and 50 ng/mL IFN  $\lambda$ 1 (4.2  $\log_{10}$  vRNA reduction, 5.0  $\log_{10}$  titer reduction)  
180 on day 4 p.i. (Fig. 4B, 4D, 4G, 4I respectively). At later time points viral load in the treated samples  
181 increased again.

182

## 183 DISCUSSION

184 We demonstrate that *ex vivo* models reconstituted from human tracheal or small airway epithelium are  
185 permissive for SARS-CoV-2 infection and robustly produces viral progenies from the apical side in long-  
186 term experiments (up to 14 days p.i.). Recent studies report on the effect of different SARS-CoV-2 isolates  
187 and incubation temperatures on virus replication kinetics<sup>22-25</sup>. We used two isolates, BavPat1 and GHB-  
188 03021, whereby the BavPat1 proved to be more readily infectious. The BavPat1 isolate carries the p.D614G  
189 substitution in the spike (S) protein while the GHB-03021 has a deletion of several amino-acids in the  
190 S1/S2 boundary that is typically found in a VeroE6-adapted isolates<sup>7</sup>. The spike substitution D614G has  
191 been reported to increase the stability and infectivity of virions in HAEC culture by enhancing the ACE2-  
192 receptor-binding<sup>26,27</sup>. Isolates with this substitution have become globally dominant<sup>26-29</sup>. Meanwhile, it has  
193 been noted that the continued propagation of SARS-CoV-2 in Vero cells causes several substitutions or  
194 deletions in the S1/S2 boundary<sup>25,30-33</sup>, which are only rarely observed in clinical samples<sup>31,32</sup>. We speculate  
195 that the adaptation to Vero cells results in a phenotype that allows more efficient entry through an ACE2-  
196 independent pathway. This entry mechanism would enhance entry in VeroE6 cells but would limit entry  
197 in primary lung epithelial cells. Further mechanistic studies are required to elucidate this hypothesis.

198 The anatomical distance and ambient temperature between upper and lower human respiratory tracts  
199 have a profound influence on the replication kinetics of respiratory viruses<sup>22,34-36</sup>. In agreement with other  
200 studies, we observed SARS-CoV-2 growth in favour of lower temperature (35°C) which can be attributed  
201 to the temperature preference of SARS-CoV-2 S protein for its folding and transport<sup>24,37</sup>. Altogether, both  
202 primary HAEC and HsAEC cultures are shown to be a robust model for SARS-CoV-2 replication that can be  
203 used for antiviral drug profiling.

204 A promising target for the development of novel antiviral agents active against coronaviruses is the viral  
205 RNA-dependent RNA polymerase (RdRp)<sup>38</sup>. Remdesivir, a phosphoramidate prodrug of an adenosine C-  
206 nucleoside, has been approved as the first COVID-19 therapy. However, its effectiveness is still a matter  
207 of debate<sup>1</sup>. In addition, it has a challenging pharmacological profile allowing intravenous administration  
208 only<sup>39-41</sup>. We demonstrate that the parent nucleoside GS-441524<sup>12-16</sup> can “sterilize” H(s)AEC cultures from  
209 SARS-CoV2 as no rebound of the virus was noted several days after removal of the molecule. Differences  
210 in antiviral potencies of RDV and GS-441524 have been reported depending on the cell lines used, which  
211 correlates with the formation of the biologically active (5'-triphosphate) metabolite<sup>12,13</sup>. Data from a  
212 pharmacokinetic study in mice suggests that GS-441524 could possibly be considered as an oral drug<sup>12</sup>.

213 AT-527 is currently being evaluated in phase II clinical trials for COVID-19 (ClinicalTrials.gov). Surprisingly,  
214 we did not observe anti-SARS-CoV-2 activity of AT-511, the free base form of AT-527, in VeroE6 and Huh7  
215 cells, nor did we observe antiviral activity in the HAEC cultures. This is in contrast with a recent publication  
216 where sub-micromolar activities of AT-511 were observed in very similar assay systems<sup>17</sup>. At this moment  
217 we have no explanation for this discrepancy. One possibility is that small differences in the assay  
218 conditions may influence the metabolization of AT-511 to its active form and thus influence its antiviral  
219 activity. As AT-511 is a double pro-drug it may be more susceptible to these nuances.

220 In addition to RDV and AT-511, we also investigated the effect of the nucleoside analogue EIDD-1931  
221 which is the active metabolite of the ester prodrug Molnupiravir (EIDD-2801). EIDD-1931 has been  
222 reported to exert antiviral activity against various human coronaviruses and Molnupiravir is currently in  
223 clinical trials for SARS-CoV-2<sup>17,18</sup>. Initial interim data from a phase II study provides first evidence for  
224 antiviral activity in COVID patients ([https://www.croiconference.org/abstract/reduction-in-infectious-  
225 sars-cov-2-in-treatment-study-of-covid-19-with-molnupiravir/](https://www.croiconference.org/abstract/reduction-in-infectious-sars-cov-2-in-treatment-study-of-covid-19-with-molnupiravir/)). Like GS-441524, EIDD-1931 also results in



226 a pronounced antiviral effect in the human airway epithelium cell cultures, which is consistent with  
227 another report<sup>18</sup>.

228 Also, a significant inhibitory effect of IFN  $\beta$ -1a and IFN  $\lambda$ 1 was noted, although at high concentrations and  
229 in particular during the first days of the treatment. At later time-points, viral replication increased in the  
230 treated cultures, suggesting that the virus can escape the effect of IFN. The effective concentration of IFN  
231  $\beta$ -1a used in this study is comparable with the clinically achievable concentration and is in line with other  
232 reports<sup>19,20,42</sup>.

233 In conclusion, we assessed (i) the replication of two SARS-CoV-2 isolates in H(s)AEC cultures and (ii) the  
234 antiviral effect of a selected list of inhibitors. These data provide a reference when developing yet other  
235 inhibitors of SARS-CoV2 replication.

## 236 **Acknowledgements**

237 We thank Birgit Voeten, Niels Cremers, Tina van Buyten and Thibault Francken for their excellent technical  
238 assistance. We also thank Piet Maes for kindly providing the SARS-CoV-2 GHB-03021/2020 isolate used in  
239 this study. This research was supported by Bill & Melinda Gates Foundation (BMGF) under grant number  
240 INV-006366. T.N.D.D received the fellowship from European Union's Horizon 2020 research and  
241 innovation programme under Marie Skłodowska-Curie grant agreement No. 812673 (OrganoVIR project).  
242 Part of this research work was performed using the 'Caps-It' research infrastructure (project ZW13-02)  
243 that was financially supported by the Hercules Foundation and Rega Foundation, KU Leuven.

## 244 **Conflict of interest**

245 All authors declare that there is no conflict of interest.

## 246 **Author contributions**

247 J.N. and D.J. conceptualized and supervised the project. T.N.D.D and D.J. designed the research. T.N.D.D.  
248 performed the ALI-related experiments. T.N.D.D. analysed data. A.J.C, P.A.G, and M.D.B. characterized  
249 AT-511 structure and tested its activity against HCV. T.N.D.D. wrote the first draft of the manuscript. D.J.,  
250 S.D.J., L.V., and J.N. edited the manuscript. L.V., D.J. and J.N. acquired the funding.

251

252



## 253 Reference

- 254 1. Consortium WHOST, Pan H, Peto R, et al. Repurposed Antiviral Drugs for Covid-19 - Interim WHO  
255 Solidarity Trial Results. *N Engl J Med.* 2021;384(6):497-511.
- 256 2. Murgolo N, Therien AG, Howell B, et al. SARS-CoV-2 tropism, entry, replication, and propagation:  
257 Considerations for drug discovery and development. *PLoS Pathog.* 2021;17(2):e1009225.
- 258 3. Boda B, Benaoudia S, Huang S, et al. Antiviral drug screening by assessing epithelial functions and  
259 innate immune responses in human 3D airway epithelium model. *Antiviral Res.* 2018;156:72-79.
- 260 4. Loo SL, Wark PAB, Esneau C, Nichol KS, Hsu AC, Bartlett NW. Human coronaviruses 229E and OC43  
261 replicate and induce distinct antiviral responses in differentiated primary human bronchial  
262 epithelial cells. *Am J Physiol Lung Cell Mol Physiol.* 2020;319(6):L926-L931.
- 263 5. Bohmer MM, Buchholz U, Corman VM, et al. Investigation of a COVID-19 outbreak in Germany  
264 resulting from a single travel-associated primary case: a case series. *Lancet Infect Dis.*  
265 2020;20(8):920-928.
- 266 6. Dellicour S, Durkin K, Hong SL, et al. A Phylodynamic Workflow to Rapidly Gain Insights into the  
267 Dispersal History and Dynamics of SARS-CoV-2 Lineages. *Mol Biol Evol.* 2020.
- 268 7. Boudewijns R, Thibaut HJ, Kaptein SJF, et al. STAT2 signaling restricts viral dissemination but drives  
269 severe pneumonia in SARS-CoV-2 infected hamsters. *Nat Commun.* 2020;11(1):5838.
- 270 8. Rut W, Groborz K, Zhang L, et al. SARS-CoV-2 M(pro) inhibitors and activity-based probes for  
271 patient-sample imaging. *Nat Chem Biol.* 2021;17(2):222-228.
- 272 9. Jochmans D, Leyssen P, Neyts J. A novel method for high-throughput screening to quantify  
273 antiviral activity against viruses that induce limited CPE. *J Virol Methods.* 2012;183(2):176-179.
- 274 10. Kärber G. Beitrag zur kollektiven Behandlung pharmakologischer Reihenversuche. *Naunyn-  
275 Schmiedebergs Archiv für experimentelle Pathologie und Pharmakologie.* 1931;162(4):480-483.
- 276 11. Spearman C. The method of 'right and wrong cases' ('constant stimuli') without Gauss's formulae.  
277 *British Journal of Psychology.* 2:227-242.
- 278 12. Li Y, Cao L, Li G, et al. Remdesivir Metabolite GS-441524 Effectively Inhibits SARS-CoV-2 Infection  
279 in Mouse Models. *Journal of Medicinal Chemistry.* 2021.
- 280 13. Pruijssers AJ, George AS, Schafer A, et al. Remdesivir Inhibits SARS-CoV-2 in Human Lung Cells and  
281 Chimeric SARS-CoV Expressing the SARS-CoV-2 RNA Polymerase in Mice. *Cell Rep.*  
282 2020;32(3):107940.
- 283 14. Shi Y, Shuai L, Wen Z, et al. The Preclinical Inhibitor GS441524 in Combination with GC376  
284 Efficaciously Inhibited the Proliferation of SARS-CoV-2 in the Mouse Respiratory Tract. *bioRxiv.*  
285 2020:2020.2011.2012.380931.
- 286 15. Xie X, Muruato AE, Zhang X, et al. A nanoluciferase SARS-CoV-2 for rapid neutralization testing  
287 and screening of anti-infective drugs for COVID-19. *Nat Commun.* 2020;11(1):5214.
- 288 16. Zandi K, Amblard F, Musall K, et al. Repurposing Nucleoside Analogs for Human Coronaviruses.  
289 *Antimicrob Agents Chemother.* 2020;65(1).
- 290 17. Good SS, Westover J, Jung KH, et al. AT-527, a double prodrug of a guanosine nucleotide analog,  
291 is a potent inhibitor of SARS-CoV-2 in vitro and a promising oral antiviral for treatment of COVID-  
292 19. *Antimicrob Agents Chemother.* 2021.
- 293 18. Sheahan TP, Sims AC, Zhou S, et al. An orally bioavailable broad-spectrum antiviral inhibits SARS-  
294 CoV-2 in human airway epithelial cell cultures and multiple coronaviruses in mice. *Sci Transl Med.*  
295 2020;12(541).
- 296 19. Lokugamage KG, Hage A, de Vries M, et al. Type I Interferon Susceptibility Distinguishes SARS-  
297 CoV-2 from SARS-CoV. *J Virol.* 2020;94(23).

- 298 20. Strayer DR, Dickey R, Carter WA. Sensitivity of SARS/MERS CoV to interferons and other drugs  
299 based on achievable serum concentrations in humans. *Infect Disord Drug Targets*. 2014;14(1):37-  
300 43.
- 301 21. Essaidi-Laziosi M, Brito F, Benaoudia S, et al. Propagation of respiratory viruses in human airway  
302 epithelia reveals persistent virus-specific signatures. *J Allergy Clin Immunol*. 2018;141(6):2074-  
303 2084.
- 304 22. Corman VM, Eckerle I, Memish ZA, et al. Link of a ubiquitous human coronavirus to dromedary  
305 camels. *Proc Natl Acad Sci U S A*. 2016;113(35):9864-9869.
- 306 23. Pohl MO, Busnadiego I, Kufner V, et al. SARS-CoV-2 Variants Reveal Features Critical for  
307 Replication in Primary Human Cells. *bioRxiv*. 2021:2020.2010.2022.350207.
- 308 24. V'kovski P, Gultom M, Kelly J, et al. Disparate temperature-dependent virus – host dynamics for  
309 SARS-CoV-2 and SARS-CoV in the human respiratory epithelium. *bioRxiv*.  
310 2020:2020.2004.2027.062315.
- 311 25. Zhu Y, Feng F, Hu G, et al. The S1/S2 boundary of SARS-CoV-2 spike protein modulates cell entry  
312 pathways and transmission. *bioRxiv*. 2020:2020.2008.2025.266775.
- 313 26. Korber B, Fischer WM, Gnanakaran S, et al. Tracking Changes in SARS-CoV-2 Spike: Evidence that  
314 D614G Increases Infectivity of the COVID-19 Virus. *Cell*. 2020;182(4):812-827.e819.
- 315 27. Yurkovetskiy L, Wang X, Pascal KE, et al. Structural and Functional Analysis of the D614G SARS-  
316 CoV-2 Spike Protein Variant. *Cell*. 2020;183(3):739-751 e738.
- 317 28. Plante JA, Liu Y, Liu J, et al. Spike mutation D614G alters SARS-CoV-2 fitness. *Nature*. 2020.
- 318 29. Zhang L, Jackson CB, Mou H, et al. The D614G mutation in the SARS-CoV-2 spike protein reduces  
319 S1 shedding and increases infectivity. *bioRxiv*. 2020.
- 320 30. Davidson AD, Williamson MK, Lewis S, et al. Characterisation of the transcriptome and proteome  
321 of SARS-CoV-2 reveals a cell passage induced in-frame deletion of the furin-like cleavage site from  
322 the spike glycoprotein. *Genome Medicine*. 2020;12(1):68.
- 323 31. Lau SY, Wang P, Mok BW, et al. Attenuated SARS-CoV-2 variants with deletions at the S1/S2  
324 junction. *Emerg Microbes Infect*. 2020;9(1):837-842.
- 325 32. Liu Z, Zheng H, Lin H, et al. Identification of Common Deletions in the Spike Protein of Severe  
326 Acute Respiratory Syndrome Coronavirus 2. *J Virol*. 2020;94(17).
- 327 33. Ogando NS, Dalebout TJ, Zevenhoven-Dobbe JC, et al. SARS-coronavirus-2 replication in Vero E6  
328 cells: replication kinetics, rapid adaptation and cytopathology. *J Gen Virol*. 2020;101(9):925-940.
- 329 34. Tyrrell DA, Bynoe ML. CULTIVATION OF A NOVEL TYPE OF COMMON-COLD VIRUS IN ORGAN  
330 CULTURES. *Br Med J*. 1965;1(5448):1467-1470.
- 331 35. Holwerda M, Kelly J, Laloli L, et al. Determining the Replication Kinetics and Cellular Tropism of  
332 Influenza D Virus on Primary Well-Differentiated Human Airway Epithelial Cells. *Viruses*.  
333 2019;11(4):377.
- 334 36. Kendall EJ, Bynoe ML, Tyrrell DA. Virus isolations from common colds occurring in a residential  
335 school. *Br Med J*. 1962;2(5297):82-86.
- 336 37. Laporte M, Stevaert A, Raeymaekers V, et al. The SARS-CoV-2 and other human coronavirus spike  
337 proteins are fine-tuned towards temperature and proteases of the human airways. *bioRxiv*.  
338 2020:2020.2011.2009.374603.
- 339 38. te Velthuis AJ. Common and unique features of viral RNA-dependent polymerases. *Cell Mol Life  
340 Sci*. 2014;71(22):4403-4420.
- 341 39. Sheahan TP, Sims AC, Graham RL, et al. Broad-spectrum antiviral GS-5734 inhibits both epidemic  
342 and zoonotic coronaviruses. *Sci Transl Med*. 2017;9(396):eaal3653.
- 343 40. Williamson BN, Feldmann F, Schwarz B, et al. Clinical benefit of remdesivir in rhesus macaques  
344 infected with SARS-CoV-2. *Nature*. 2020;585(7824):273-276.

- 345 41. Warren TK, Jordan R, Lo MK, et al. Therapeutic efficacy of the small molecule GS-5734 against  
346 Ebola virus in rhesus monkeys. *Nature*. 2016;531(7594):381-385.
- 347 42. Vanderheiden A, Ralfs P, Chirkova T, et al. Type I and Type III Interferons Restrict SARS-CoV-2  
348 Infection of Human Airway Epithelial Cultures. *J Virol*. 2020;94(19).

349

350

## 351 **Legends to the Figures**

352 **Figure 1. SARS-CoV-2 replication kinetics in air-liquid interface cultures.** Viral replication of BavPat1 and GHB-03021 isolates at  
353  $2 \times 10^3$  TCID<sub>50</sub>/insert in human tracheal airway epithelia cells (A-D) or in human small airway epithelia cells (E-H) at either 35°C  
354 (red circle) or 37°C (blue square) in comparison with uninfected control (black triangle). Viral RNA or infectious particles in apical  
355 washes were quantified by RT-qPCR (A, C, E, G) or by end-point titrations (B, D, F, H), respectively. The results of individual inserts  
356 are depicted as dots. The line follows the average of each conditions.

357 **Figure 2. GS-441524 blocks SARS-CoV-2 replication in primary human airway cultures.** Compounds were added to the basal  
358 medium at different concentrations, starting from the in vitro EC<sub>50</sub>. The treatment period is illustrated in grey, initiating at 2  
359 hours before infection. Viral RNA or infectious particles in apical washes were quantified by RT-qPCR (A-C, F-G) or by end-point  
360 titrations (D-E, H), respectively. (A) Effect of GS-441524 at 10 and 1 μM on the replication of the GHB-03021 isolate. Tracheal  
361 tissues were infected with  $2 \times 10^4$  TCID<sub>50</sub>/insert at 37°C. The viral production was compared between groups after 9 (B, D) or 14  
362 days post-infection (C, E). (F) Activity of GS-441524 at 3 μM on the replication of the BavPat1 isolate. Small airway tissues were  
363 infected with BavPat1 isolate at  $2 \times 10^3$  TCID<sub>50</sub>/insert at 37°C. Viral production was compared between groups at the end of the  
364 treatment (G-H). All data are mean ± SD of at least three independent ALL inserts. The dotted lines represent the lower limit of  
365 detection (LLOD). Asterisks indicate a significant difference between treated samples and infected untreated control. \*p < 0.05,  
366 \*\*p < 0.01, \*\*\*p < 0.001, \*\*\*\*p < 0.0001

367 **Figure 3. Antiviral activity of nucleoside analogues against SARS-CoV-2 in primary human tracheal airway cultures.** Compounds  
368 were added to the basal medium at different concentrations, starting 1 hour before infection with BavPat1 isolate at  $2 \times 10^3$   
369 TCID<sub>50</sub>/insert at 37°C. Basal medium, with or without compounds, was refreshed every other day from day 0 to day 8. Viral RNA  
370 or infectious particles in apical washes were quantified by RT-qPCR (A-C, F-H) or by end-point titrations (D-E, I-J), respectively.  
371 Dose-response and time-dependent activity of AT-511 (A) and EIDD-1931 (F). Comparison of the viral production between groups  
372 after 6 (B, D, G, I) or 8 days post-infection (C, E, H, J). All data are mean ± SD of at least three replicates. The dotted lines represent  
373 the lower limit of detection (LLOD). Asterisks indicate a significant difference between treated samples and infected untreated  
374 control. \*p < 0.05, \*\*p < 0.01, \*\*\*p < 0.001, \*\*\*\*p < 0.0001

375 **Figure 4. Prophylactic interferon type I and type III reduce SARS-CoV-2 production.** IFNs were added to the basal medium at  
376 different concentrations 24 hours before infection with BavPat1 isolate ( $2 \times 10^3$  TCID<sub>50</sub>/insert at 37°C) and medium with or  
377 without IFNs was refreshed every other day from day 0 to day 8. Viral RNA or infectious virions in apical washes were quantified  
378 by RT-qPCR (A-C, F-H) or by end-point titrations (D-E, I-J), respectively. Dose-response and time-dependent activity of AT-511 (A)  
379 and EIDD-1931 (F). The viral production was compared between groups after 4 (B, D, G, I) or 6 days post-infection (C, E, H, J). All  
380 data are mean ± SD of at least three replicates. The dotted lines represent the lower limit of detection (LLOD). Asterisks indicate  
381 a significant difference between treated samples and infected untreated control. \*p < 0.05, \*\*p < 0.01, \*\*\*p < 0.001, \*\*\*\*p <  
382 0.0001

383

384

385 **Table 1. Antiviral activity against SARS-CoV-2 in cell culture**

| Compounds | VeroE6-GFP      |                 |       | Huh-7           |                 |      |
|-----------|-----------------|-----------------|-------|-----------------|-----------------|------|
|           | EC50 ( $\mu$ M) | CC50 ( $\mu$ M) | SI    | EC50 ( $\mu$ M) | CC50 ( $\mu$ M) | SI   |
| GS-441524 | 0.78 – 0.89     | 49 - 83         | > 50  | 1.1 – 1.5       | 37 – 59         | > 20 |
| AT-511    | > 100           | > 100           | ND    | > 100           | > 100           | ND   |
| EIDD-1931 | 0.57 – 0.87     | > 100           | > 100 | 1.3 – 1.4       | 11 - 12         | 8.5  |

386 Data represents the interquartile range (Q1-Q3) obtained from at least two independent experiments, each performed with  
387 duplicate samples. Abbreviations: SI, selectivity index. ND: not determined

388

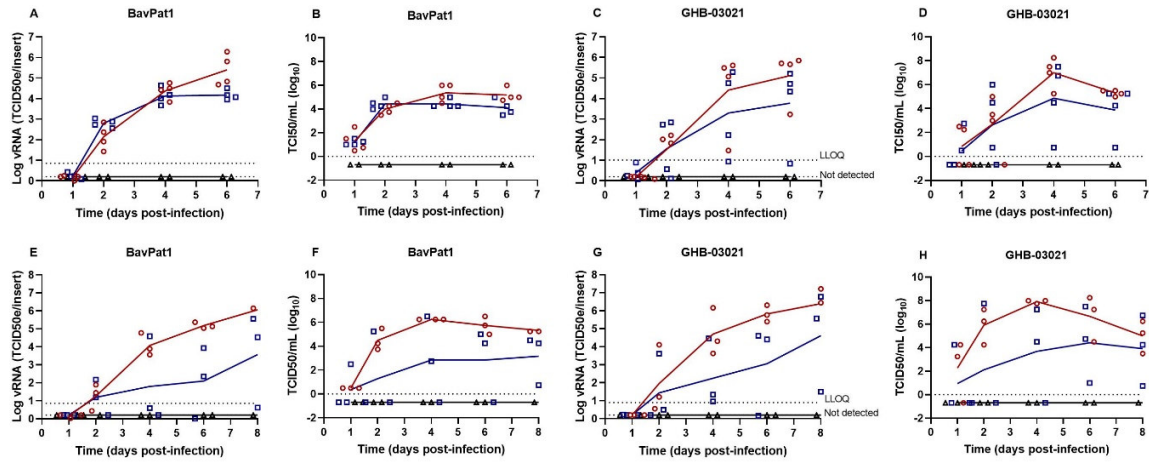

389

390

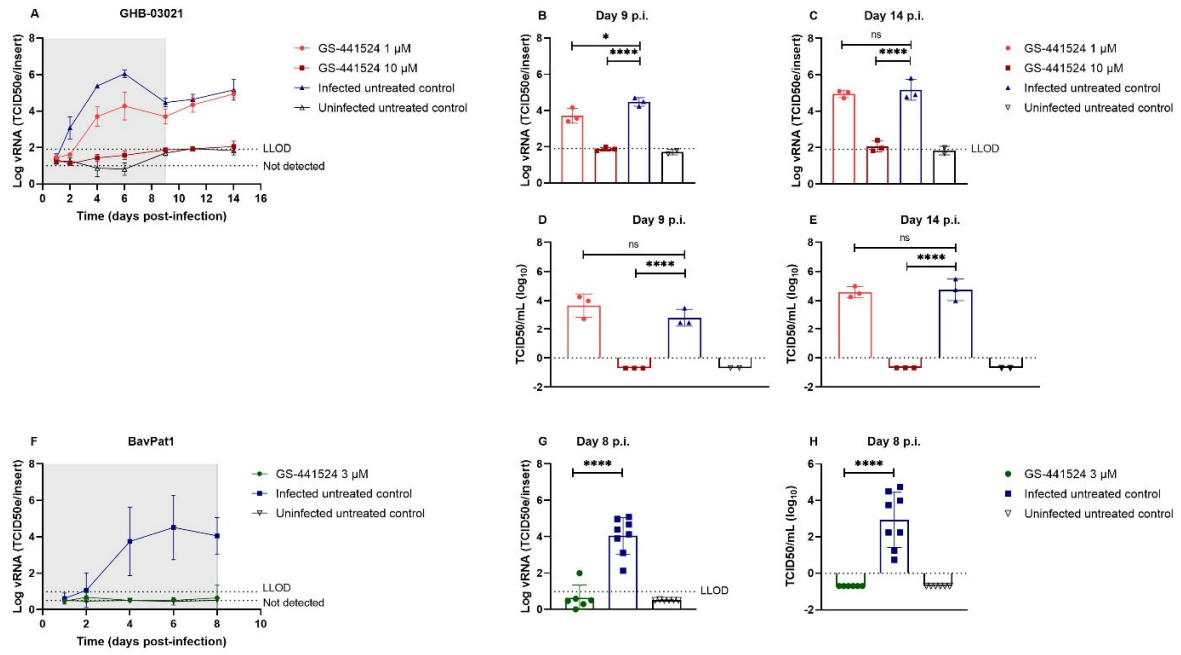

391

392

393



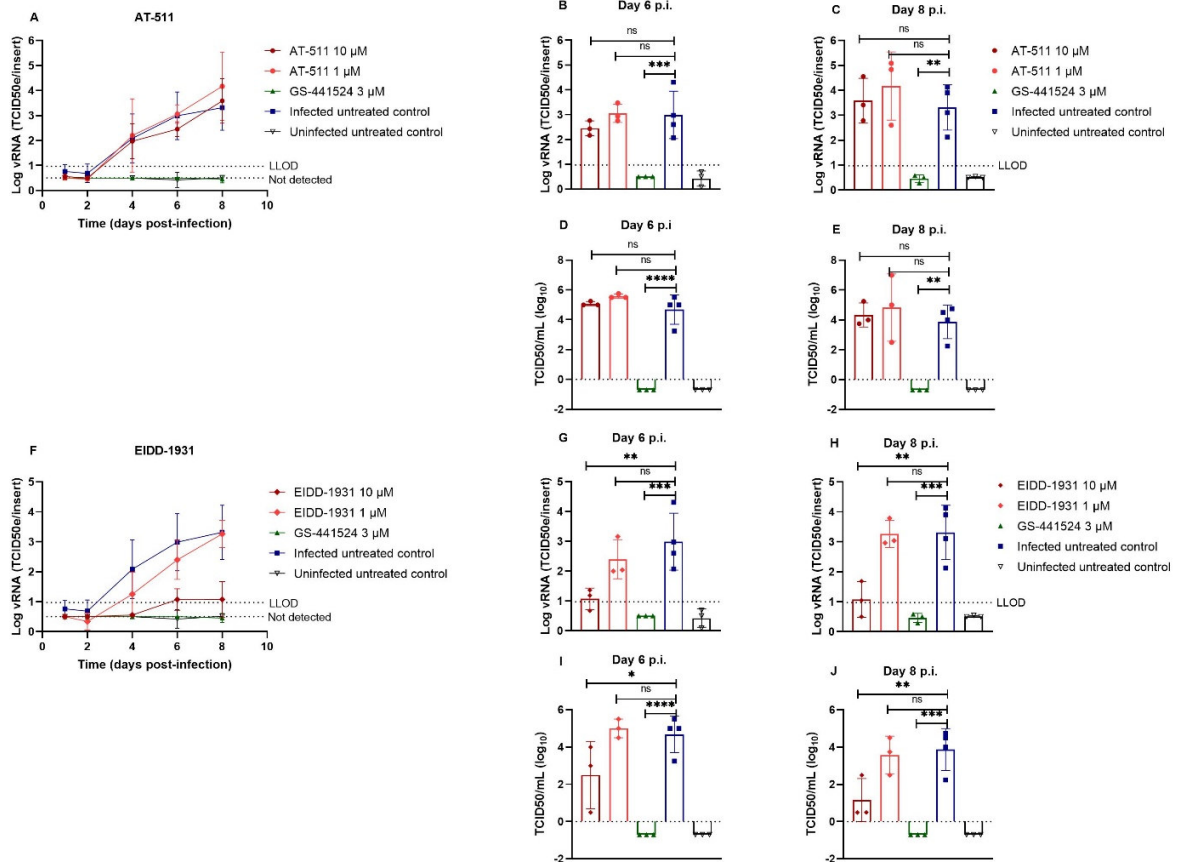

394

395

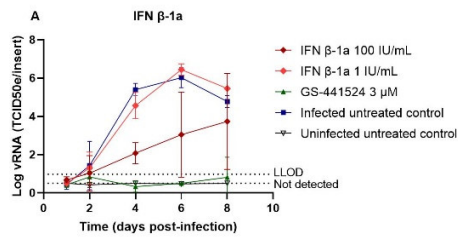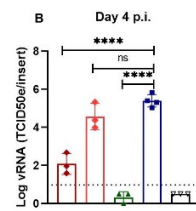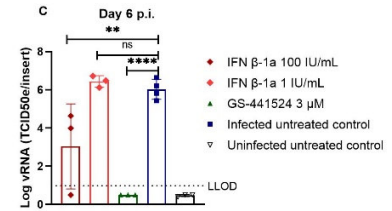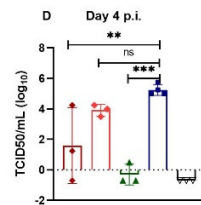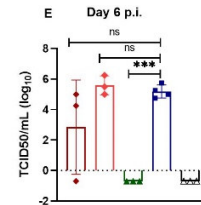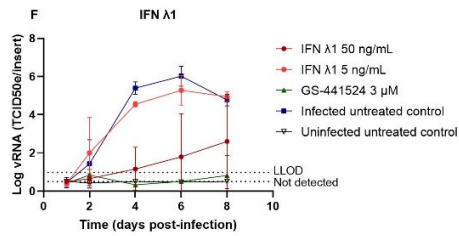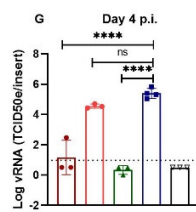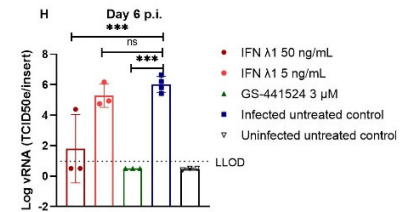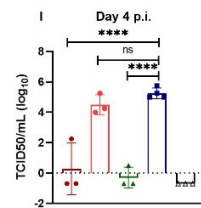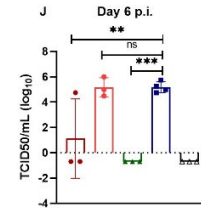

Source: https://www.biorxiv.org/content/10.1101/2021.03.25.436907v2.full.pdf
